# Supplementary material for: Construction of a high fidelity epidermis-on-a-chip for scalable in vitro irritation evaluation
Source: Royal Society of Chemistry journal article supplement (doi:10.1039/d1lc00099c), 2021-01-01
Supplement: d1lc00099c1.pdf [file d1lc00099c1.pdf]

### Supplementary Figure 1

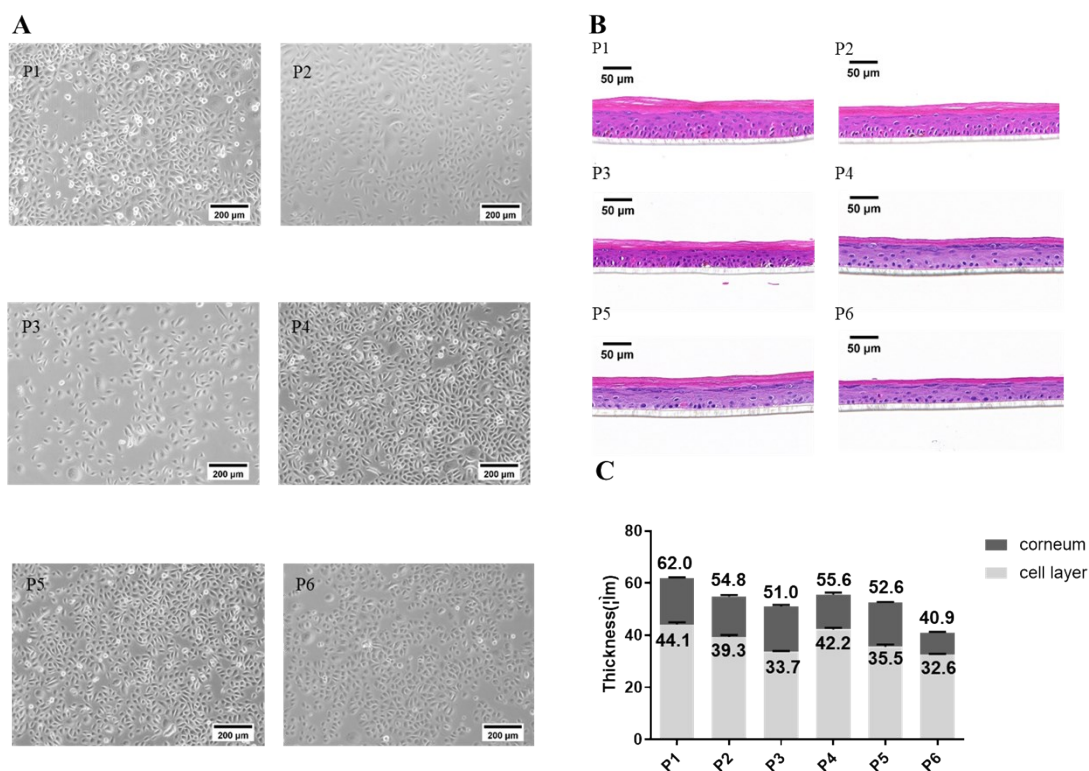

**Supplementary Figure 1** The morphology of different passages of human keratinocytes and their constructed epidermis. (A) Morphology of NHKs within 6 passages. (B) HE staining of the 3D epidermis equivalents constructed by NHKs from passage 1-6). Scale bars: A 100 µm, B 50 µm. (C) Statistic analysis of the thickness of the static epidermis.
